# Supplementary material for: Spatial separation of photogenerated electron–hole pairs in solution-grown ZnO tandem n–p core–shell nanowire arrays toward highly sensitive photoelectrochemical detection of hydrogen peroxide
Source: Royal Society of Chemistry journal article supplement (doi:10.1039/c7ta01620d), 2017-01-01
Supplement: c7ta01620d1.pdf [file c7ta01620d1.pdf]

## Supplementary Information

### **Spatial Separation of Photogenerated Electron–Hole Pairs in Solution-Grown ZnO n–p Core–Shell Nanowire Arrays toward Highly Sensitive Photoelectrochemical Detection of Hydrogen Peroxide**

Yun Cai,<sup>a</sup> Rajeevan Kozhummal,<sup>bc</sup> Christian Kübel,<sup>d</sup> Vanessa Trouillet,<sup>e</sup> Michael Bruns,<sup>e</sup>  
Sebastian Gutsch,<sup>b</sup> Margit Zacharias<sup>b</sup> and Yang Yang<sup>\*a</sup>

<sup>a</sup>State Key Laboratory of Materials-Oriented Chemical Engineering, College of Chemical Engineering, Nanjing Tech University, Nanjing 210009, China

<sup>b</sup>Institute of Microsystems Engineering (IMTEK), Albert Ludwigs University of Freiburg, D-79110 Freiburg, Germany

<sup>c</sup>College of Engineering Tricaripur, Kerala, India–671313

<sup>d</sup>Institute of Nanotechnology (INT) and Karlsruhe Nano Micro Facility (KNMF), Karlsruhe Institute of Technology (KIT), D-76344 Eggenstein-Leopoldshafen, Germany

<sup>e</sup>Institute for Applied Materials (IAM) and Karlsruhe Nano Micro Facility (KNMF), Karlsruhe Institute of Technology (KIT), D-76344 Eggenstein-Leopoldshafen, Germany

Corresponding author email: [yangy@njtech.edu.cn](mailto:yangy@njtech.edu.cn)

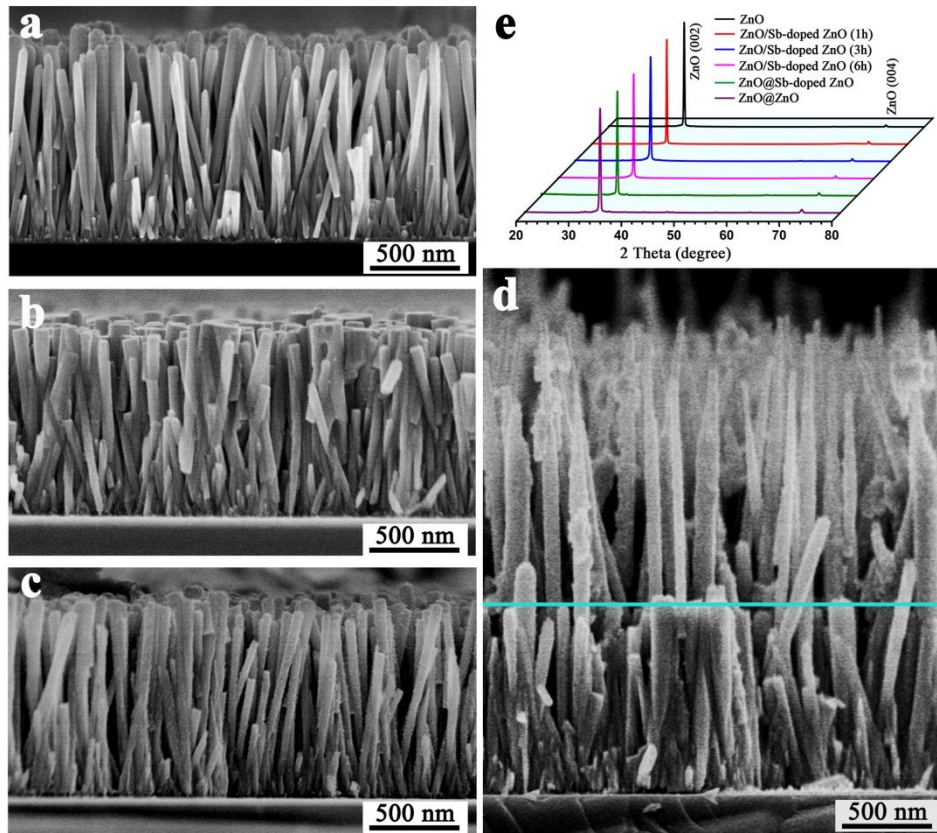

**Fig. S1** The cross-sectional SEM images of (a) primary ZnO NWAs, (b) ZnO@ZnO core-shell NWAs by PEG-assisted secondary growth, (c) ZnO@Sb-doped ZnO core-shell NWAs by PEG-assisted secondary growth, and (d) ZnO/Sb-doped ZnO axial NWAs by secondary growth without PEG. The blue line in (d) indicates the boundary where the axial secondary growth started. The time for secondary growth was 6 h in each case. (e) XRD patterns of primary ZnO NWAs, ZnO/Sb-doped ZnO axial NWAs by secondary growth without PEG during different growth time, ZnO@Sb-doped ZnO core-shell NWAs by PEG-assisted secondary growth and ZnO@ZnO core-shell NWAs by PEG-assisted secondary growth.

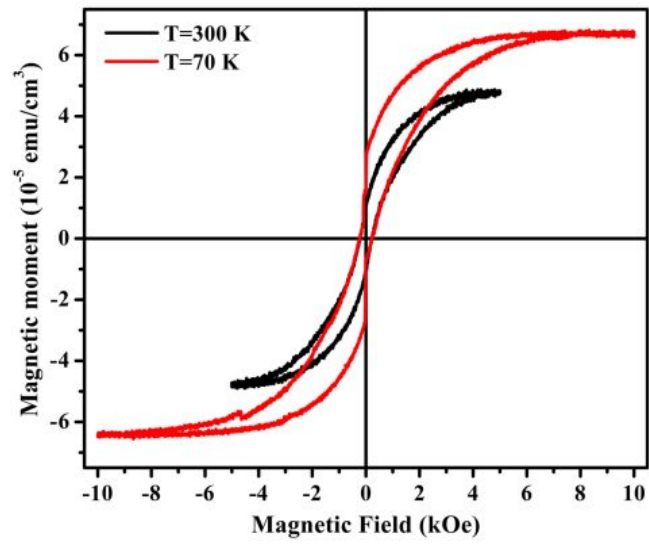

**Fig. S2** Magnetization behavior of ZnO@Sb-doped ZnO core-shell nanowires at 300 K and 70 K.

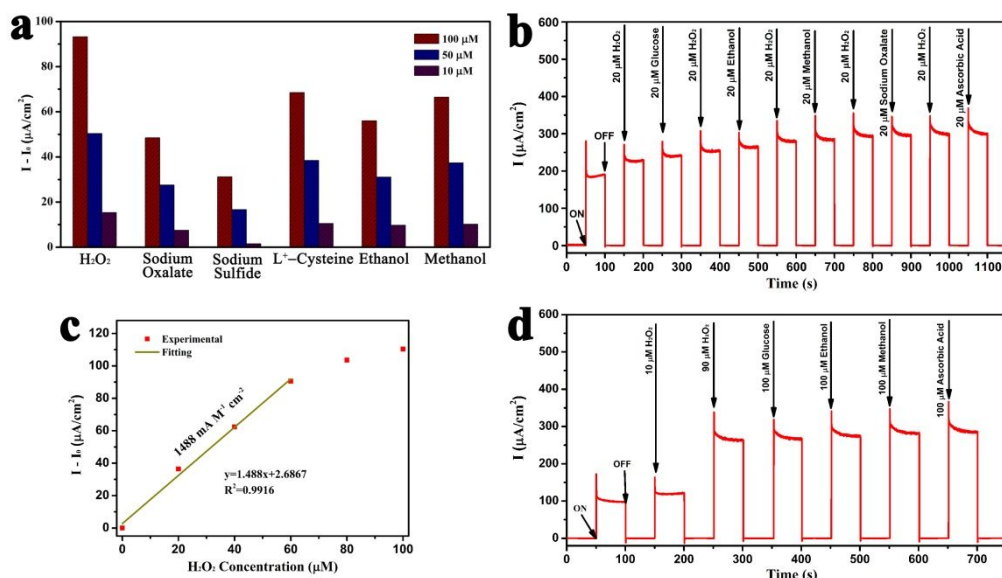

**Fig. S3** (a) The current change of ZnO@Sb-doped ZnO core-shell NWAs in response to different hole scavengers at different concentrations. (b) Photocurrent response curves of ZnO@Sb-doped ZnO core-shell NWAs against H<sub>2</sub>O<sub>2</sub> with concentration initiating from 0 to 100  $\mu\text{M}$  by a 20  $\mu\text{M}$  interval in the presence of different interfering species of glucose, ethanol, methanol, sodium oxalate and ascorbic acid (20  $\mu\text{M}$ ). (c) Linear relationship between the current change and the H<sub>2</sub>O<sub>2</sub> concentration in a range of 0–60  $\mu\text{M}$ . (d) Photocurrent response curves intended for the interference studies of ZnO@Sb-doped ZnO core-shell NWAs by successive additions of 100  $\mu\text{M}$  glucose, 100  $\mu\text{M}$  ethanol, 100  $\mu\text{M}$  methanol and 100  $\mu\text{M}$  ascorbic acid in 100  $\mu\text{M}$  H<sub>2</sub>O.
